# Supplementary material
Source: PubMed Central journal article supplement (PMC7296452)
Supplement: jamaneurol-e201118-s003.pdf [file jamaneurol-e201118-s003.pdf]

## Data Sharing Statement

Tanasescu. Hookworm Treatment for Relapsing Multiple Sclerosis.  
*JAMA Neurol.* Published June 15, 2020.  
10.1001/jamaneurol.2020.1118

### Data

**Data available:** Yes

**Data types:** Other (please specify)

**Additional Information:** The data that support the findings of this study are available from the corresponding author, upon reasonable request.

**How to access data:** The data that support the findings of this study are available from the corresponding author, upon reasonable request.

**When available:** With publication

### Supporting Documents

**Document types:** None

### Additional Information

**Who can access the data:** The data that support the findings of this study are available from the corresponding author, upon reasonable request.

**Types of analyses:** The data that support the findings of this study are available from the corresponding author, upon reasonable request.

**Mechanisms of data availability:** The data that support the findings of this study are available from the corresponding author, upon reasonable request.
